# Supplementary material for: Imputation-Based Genomic Coverage Assessments of Current Human Genotyping Arrays
Source: PubMed Central journal article supplement (PMC3789804; doi:10.1534/g3.113.007161), 2013-10-01
Supplement: supp_g3.113.007161_FigureS2.pdf [file supp_g3.113.007161_FigureS2.pdf]

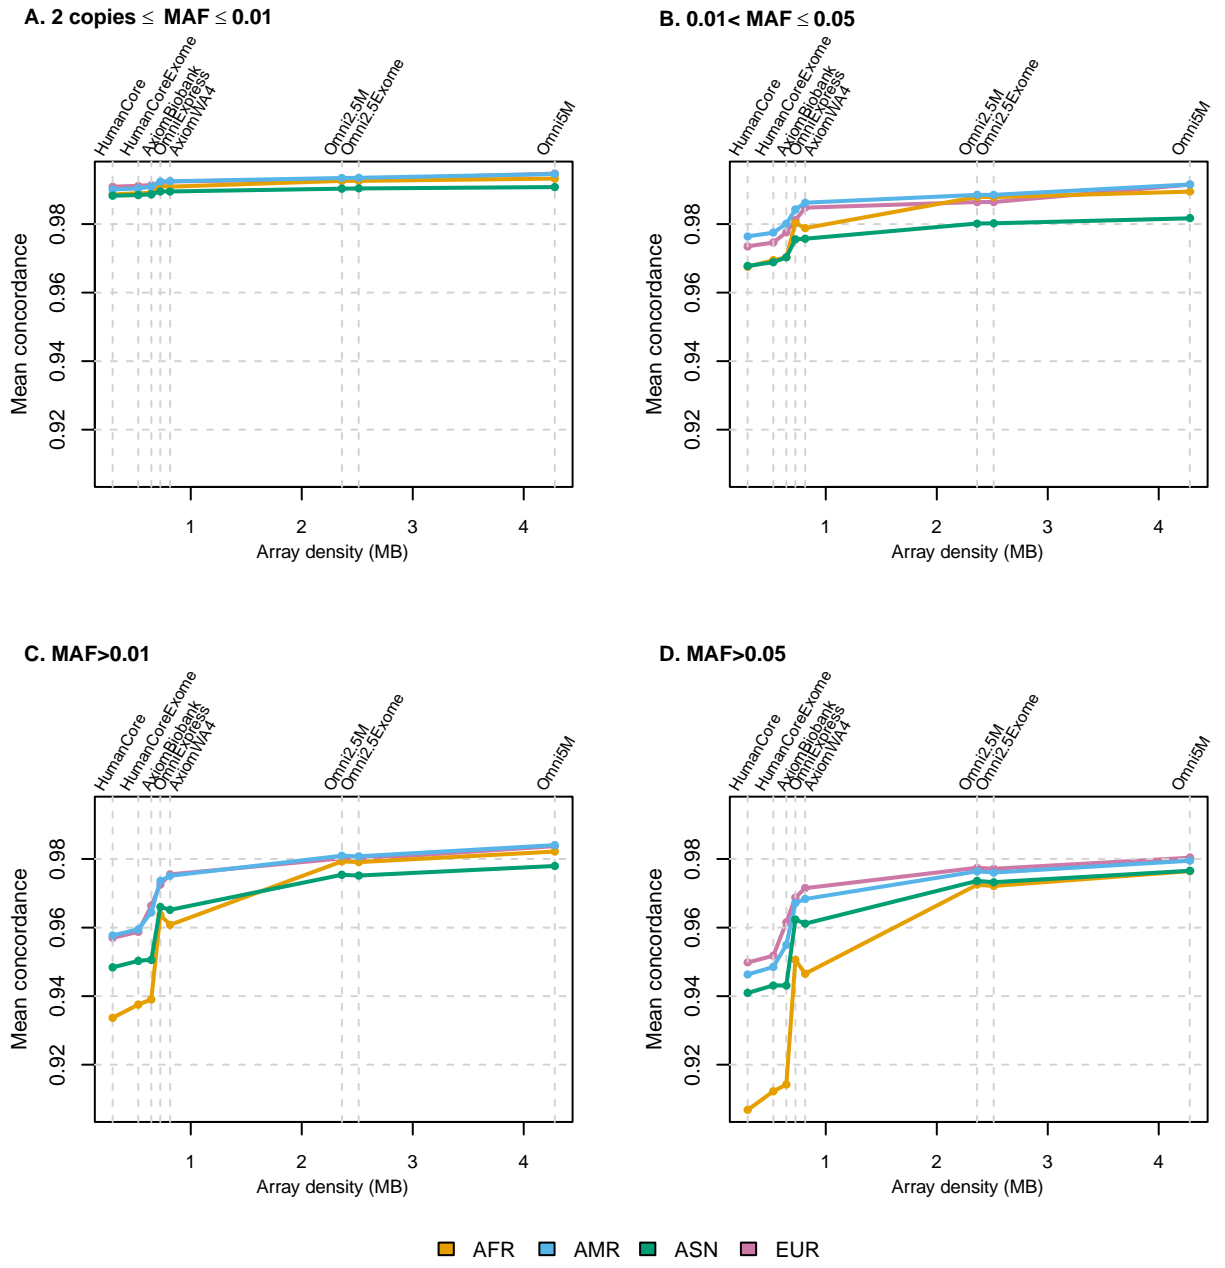

**Figure S2 Mean genotype concordance, by MAF bin and ancestry group.** Panel (A) is for variants with at least two copies of the minor allele and  $\text{MAF} \leq 0.01$ , (B) for  $0.01 < \text{MAF} \leq 0.05$ , (C) for  $\text{MAF} > 0.01$ , and (D) for  $\text{MAF} > 0.05$ .
