# Supplementary material for: Imputation-Based Genomic Coverage Assessments of Current Human Genotyping Arrays
Source: PubMed Central journal article supplement (PMC3789804; doi:10.1534/g3.113.007161), 2013-10-01
Supplement: supp_g3.113.007161_FigureS9.pdf [file supp_g3.113.007161_FigureS9.pdf]

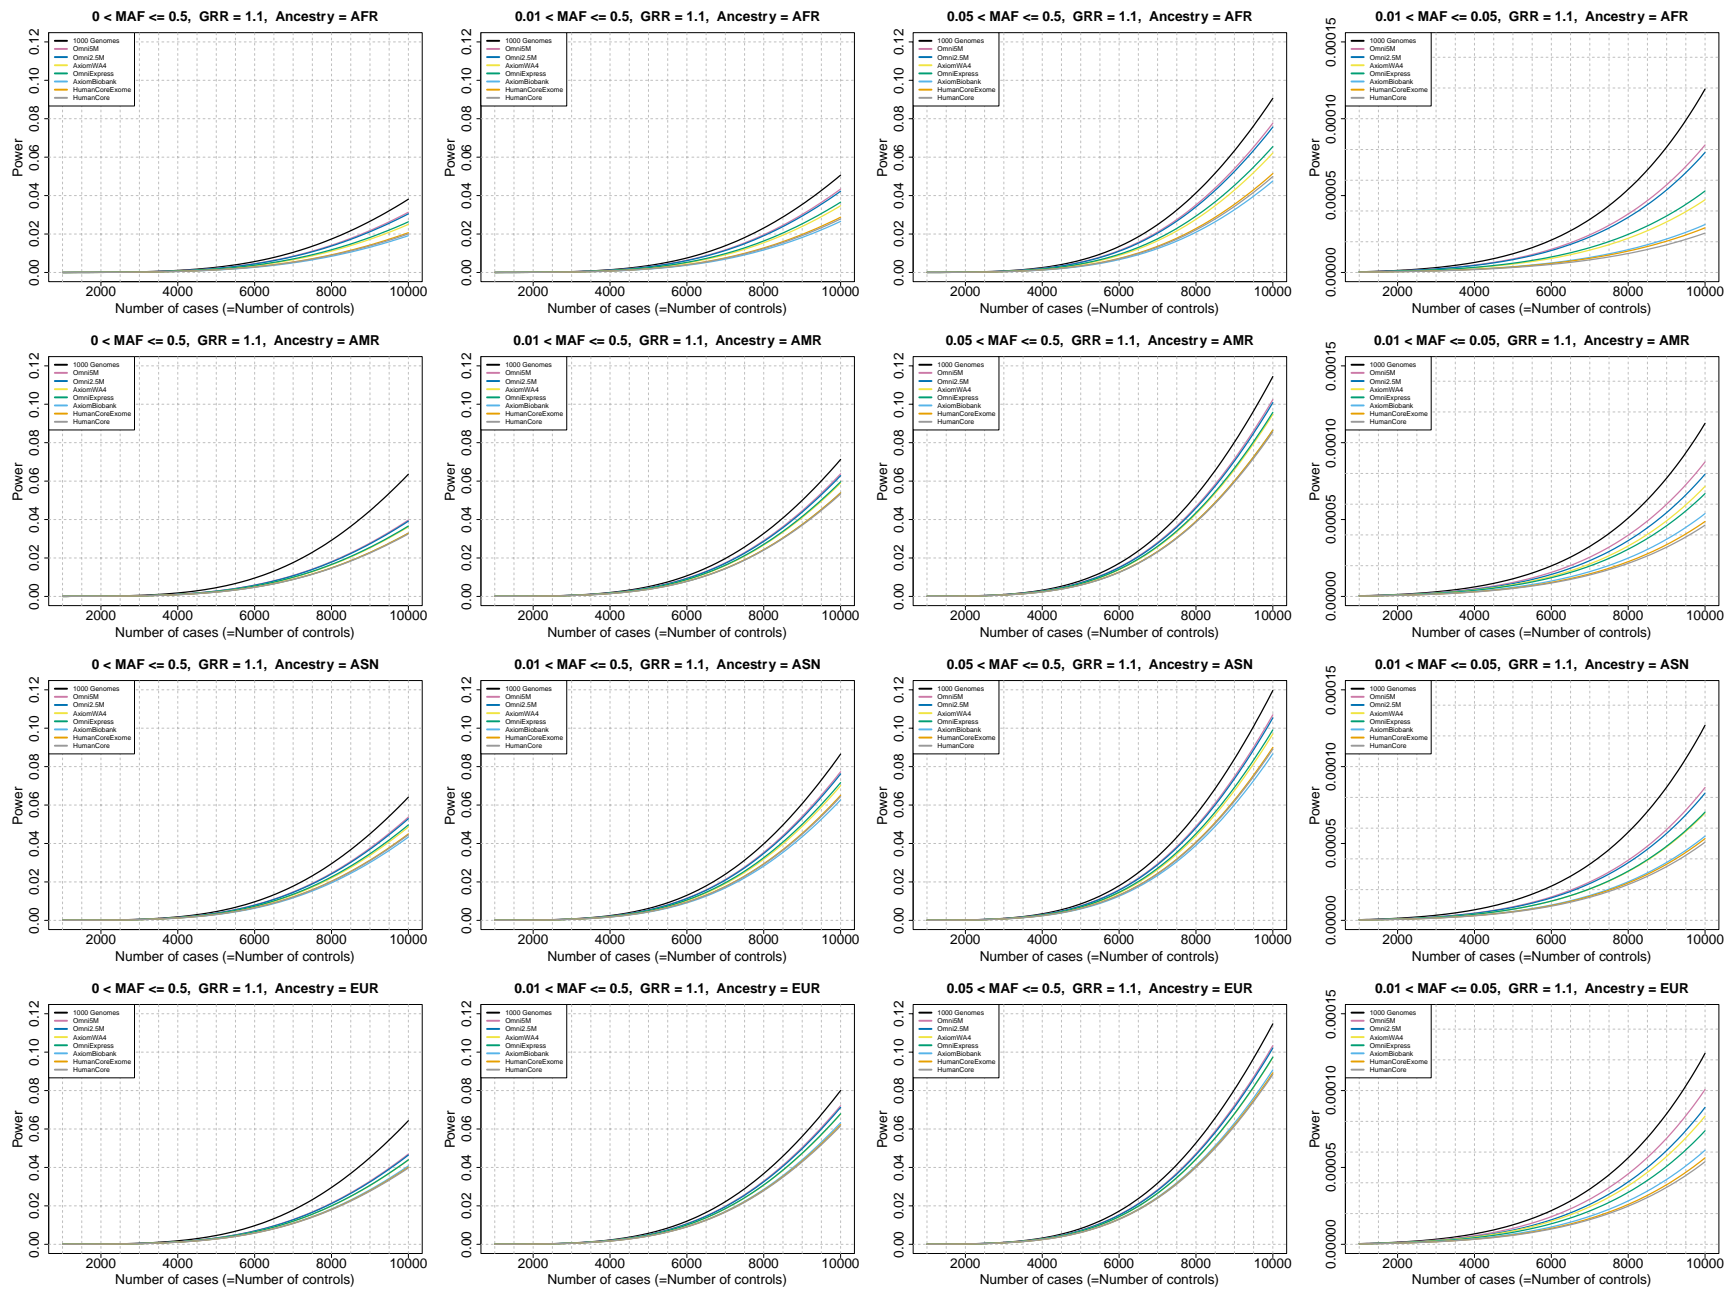

**Figure S9 Genome-wide power estimates for GRR=1.1, across MAF bins and ancestries.** The array Omni2.5+Exome is not shown in these plots because it is indistinguishable at this resolution from the Omni2.5M array. In the legend, “1000 Genomes” refers to a hypothetical array in which all variants in the 1000 Genomes dataset would be typed.
