# Supplementary material for: Imputation-Based Genomic Coverage Assessments of Current Human Genotyping Arrays
Source: PubMed Central journal article supplement (PMC3789804; doi:10.1534/g3.113.007161), 2013-10-01
Supplement: supp_g3.113.007161_FigureS10.pdf [file supp_g3.113.007161_FigureS10.pdf]

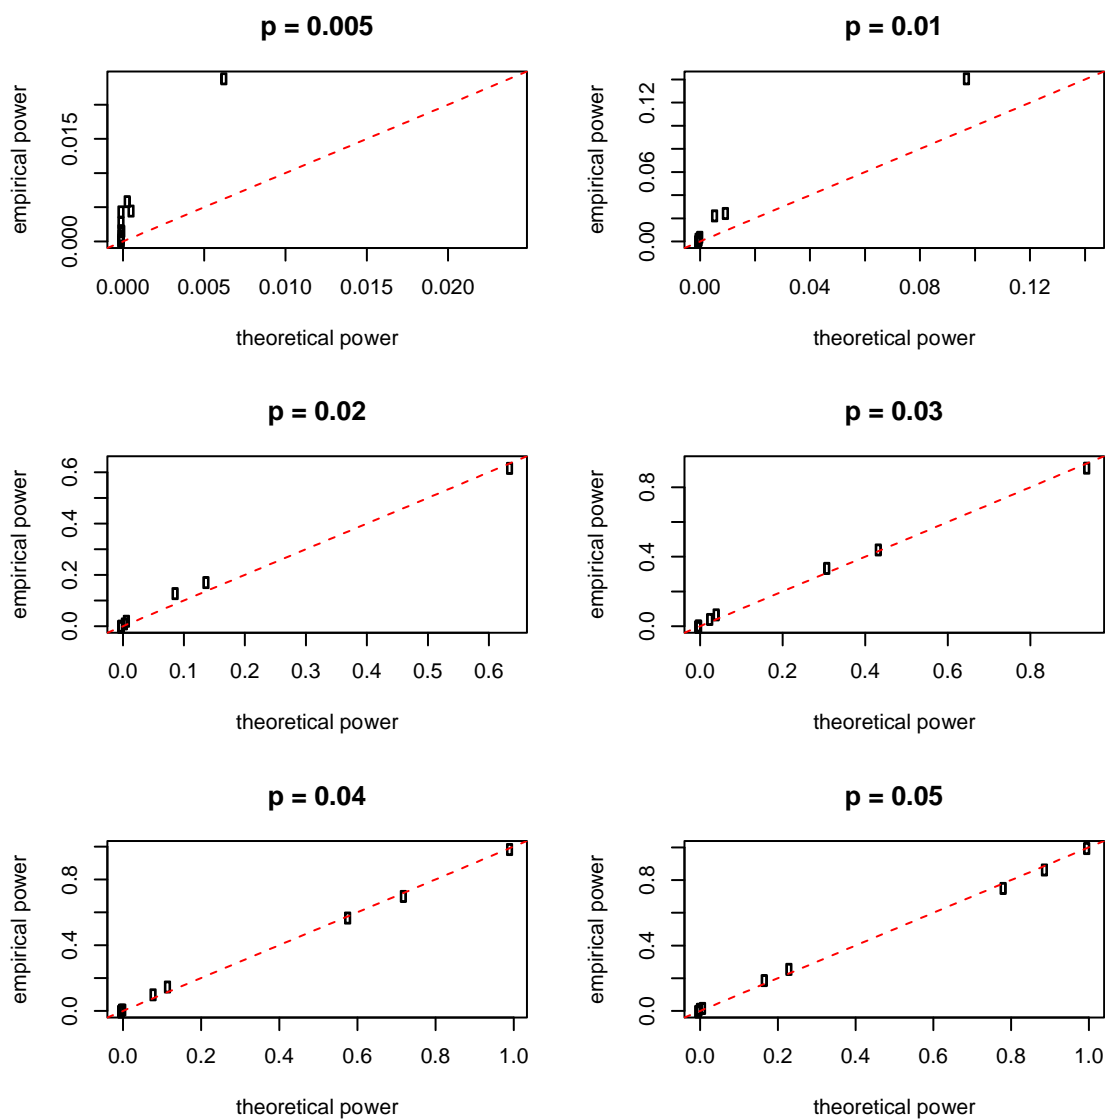

**Figure S10 Comparison of theoretical and empirical power of allelic association tests with low MAF.** Empirical power was estimated from 1,000,000 replicate simulations of data for each of several parameter sets, using the  $z_1^2$  test and  $\alpha = 5 \times 10^{-8}$ , while theoretical power was estimated using the non-centrality parameter  $\lambda_1$  defined in the Appendix. The parameter sets consist of all combinations of  $GRR \in \{1.1, 1.2, 1.3, 1.4\}$ ,  $N_{cases} = N_{controls} \in \{1000, 5000, 10000\}$ , population prevalence of 0.05, and allelic frequency  $p \in \{0.005, 0.01, 0.02, 0.03, 0.04, 0.05\}$ . Each plot is for a different MAF and each point represents the results for one parameter set.
